# Supplementary material
Source: bioRxiv or medRxiv preprint supplement (https://www.biorxiv.org/content/biorxiv/early/2019/07/28/717728/DC1/embed/media-1.pdf)

Figure S1

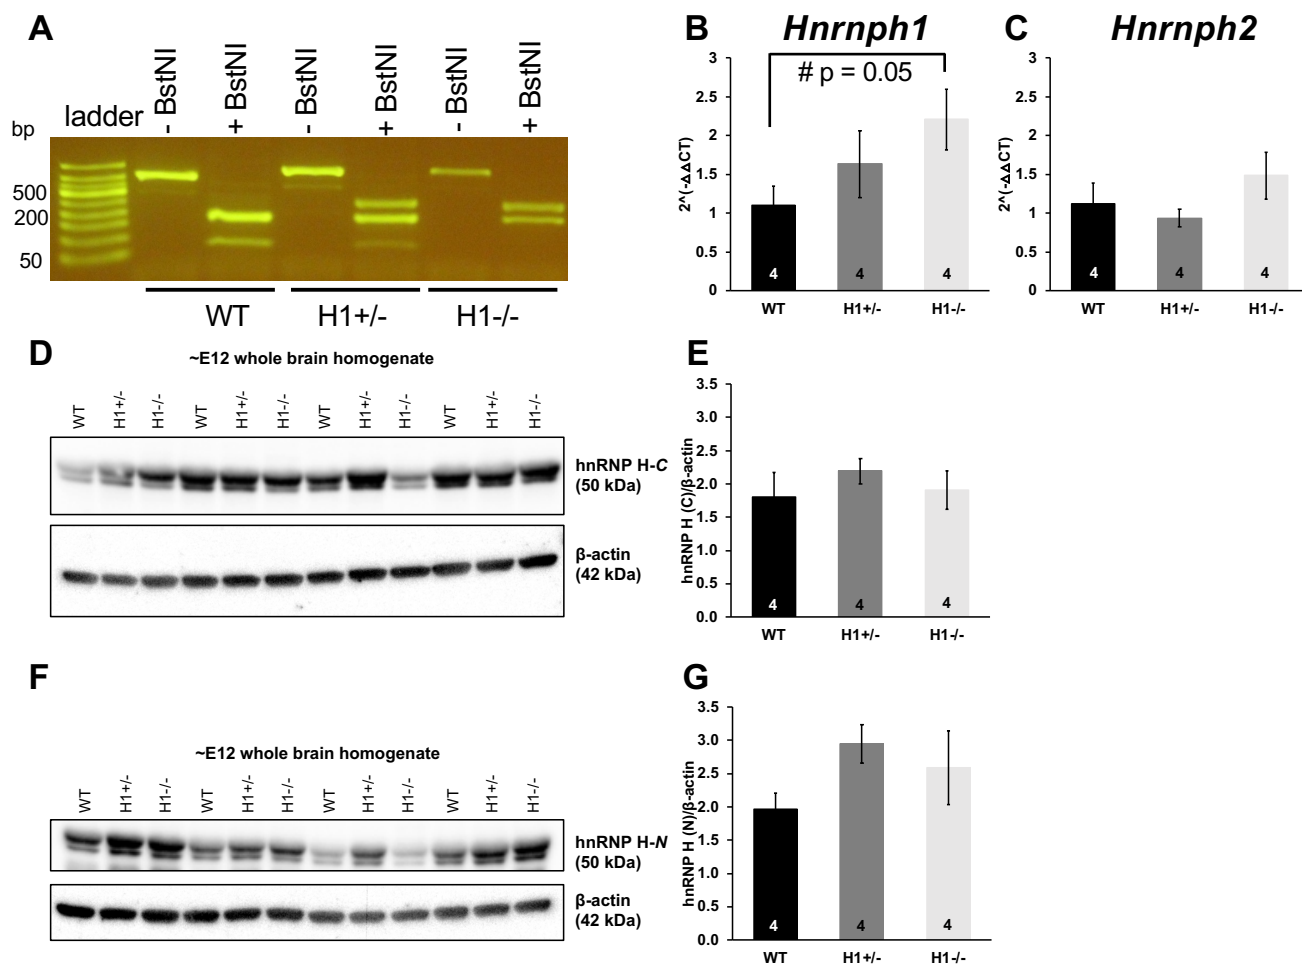

# Figure S2

**A**

|   | hnRNP H1 unique peptide sequence |
|---|----------------------------------|
| 1 | MMLGAEGGEGFVVK                   |
| 2 | MLGAEGGEGFVVK                    |
| 3 | GLPWSCSADEVQR                    |
| 4 | SNNVEMDWVLK                      |
| 5 | GAYGGGYGGYDDYNGYNDGYGFGSDR       |
| 6 | YGDGGSTFQSTTGHCVHMR              |
| 7 | VTGEADVEFATHEDAVAAMSK            |
| 8 | YVELFLNSTAGASGGAYEHR             |

**B**

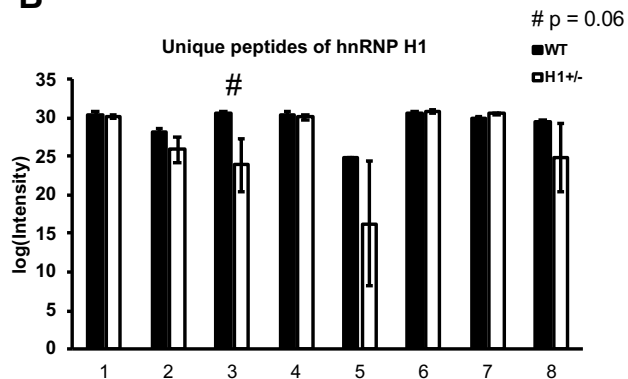

**C**

|   | hnRNP H2 unique peptide sequence |
|---|----------------------------------|
| 1 | ATENDIYNFFSPLNPMR                |
| 2 | GAYGGGYGGYDDYGGYNDGYGFGSDR       |
| 3 | GLPWSCSAEEVMR                    |
| 4 | SNSVEMDWVLK                      |
| 5 | VTGEADVEFATHEDAVAAMAK            |
| 6 | YGDGGSSFQSTTGHCVHMR              |

**D**

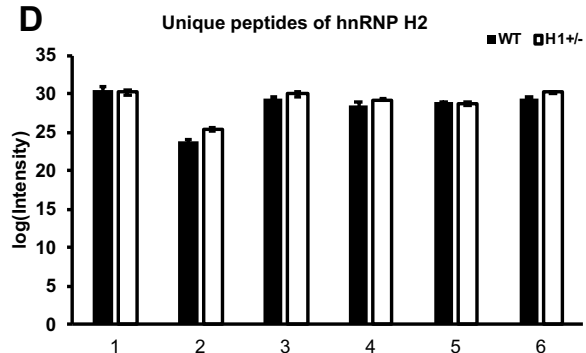

Figure S3

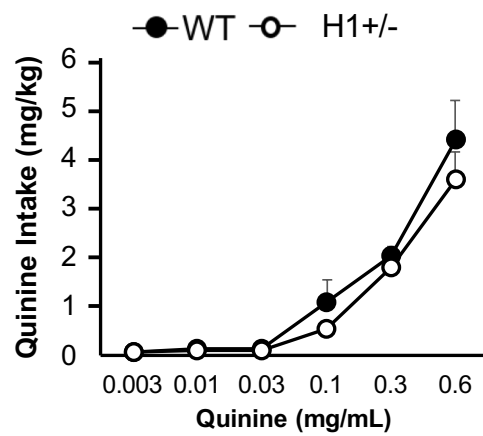

**Figure S4**

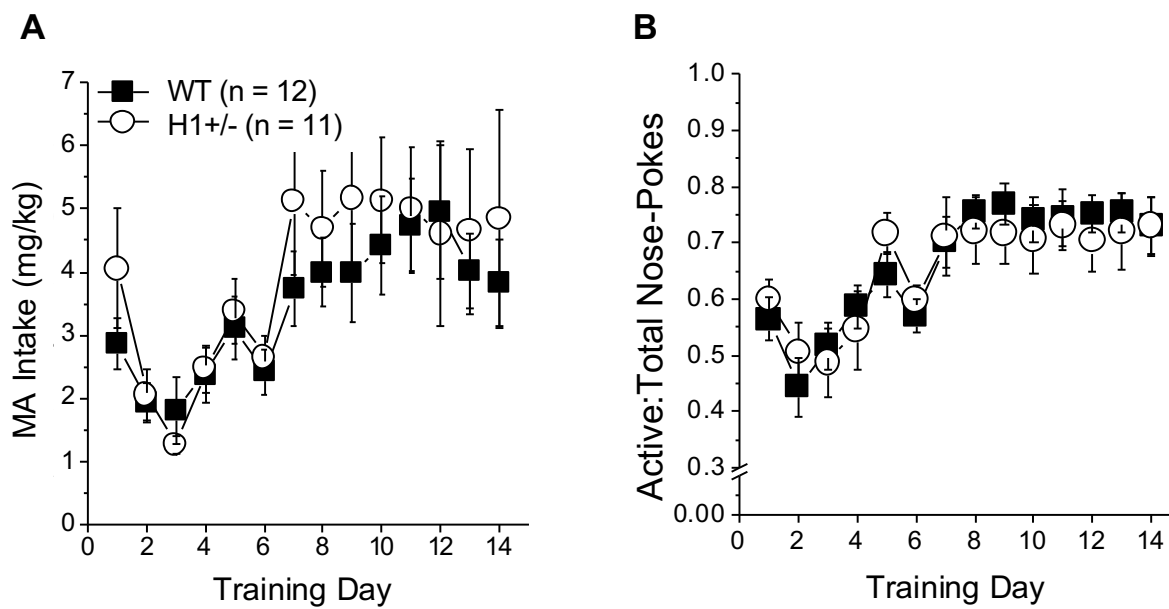

# Figure S5

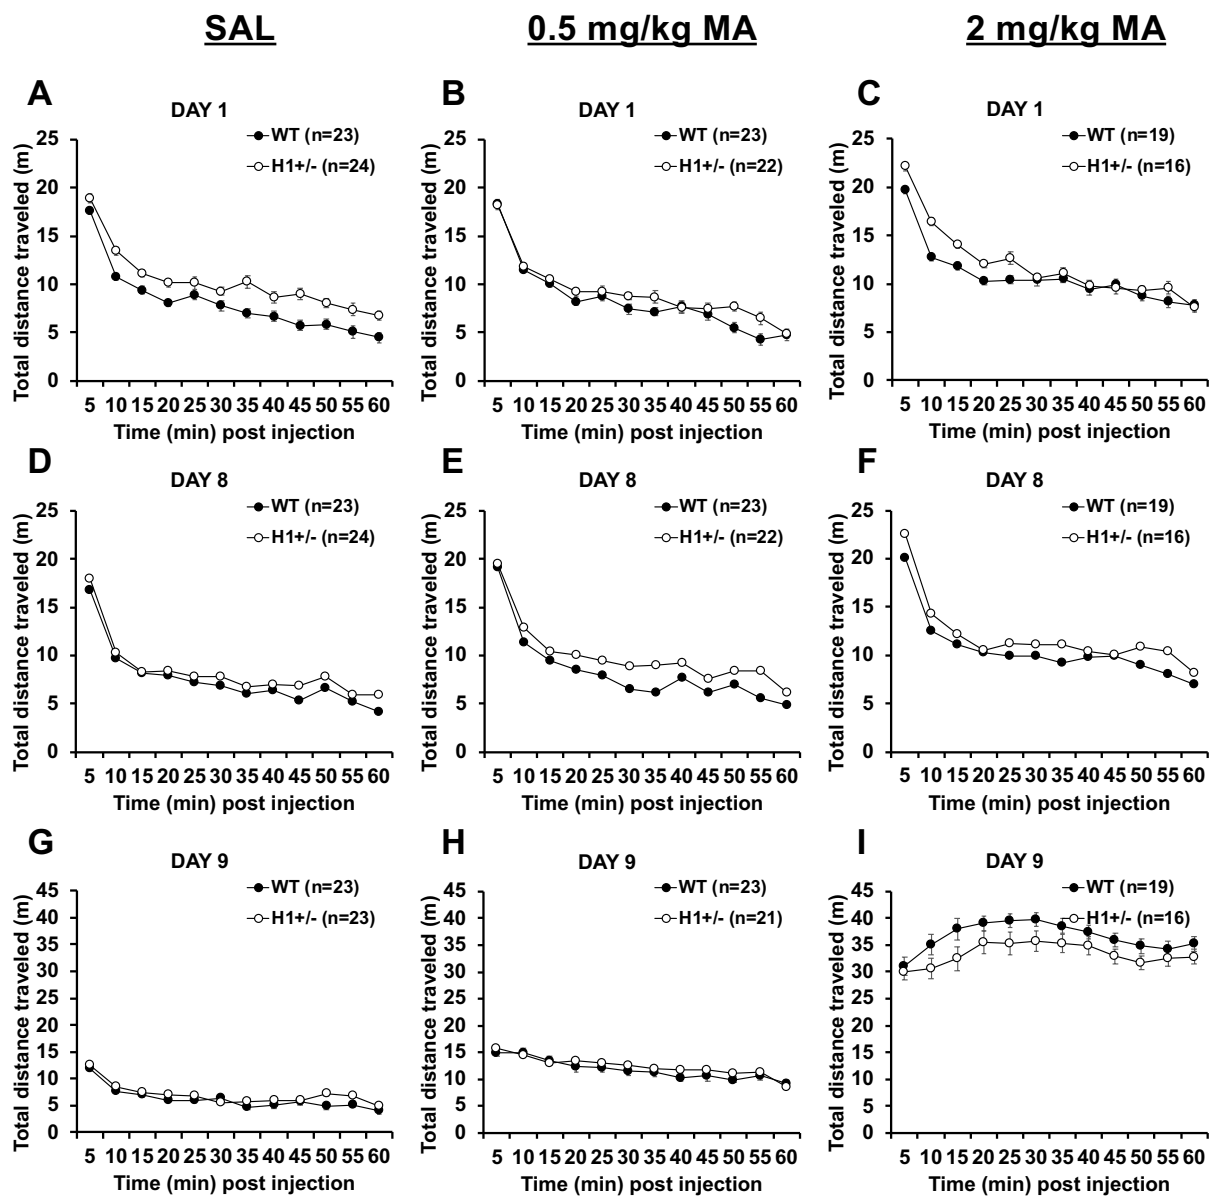

Figure S6

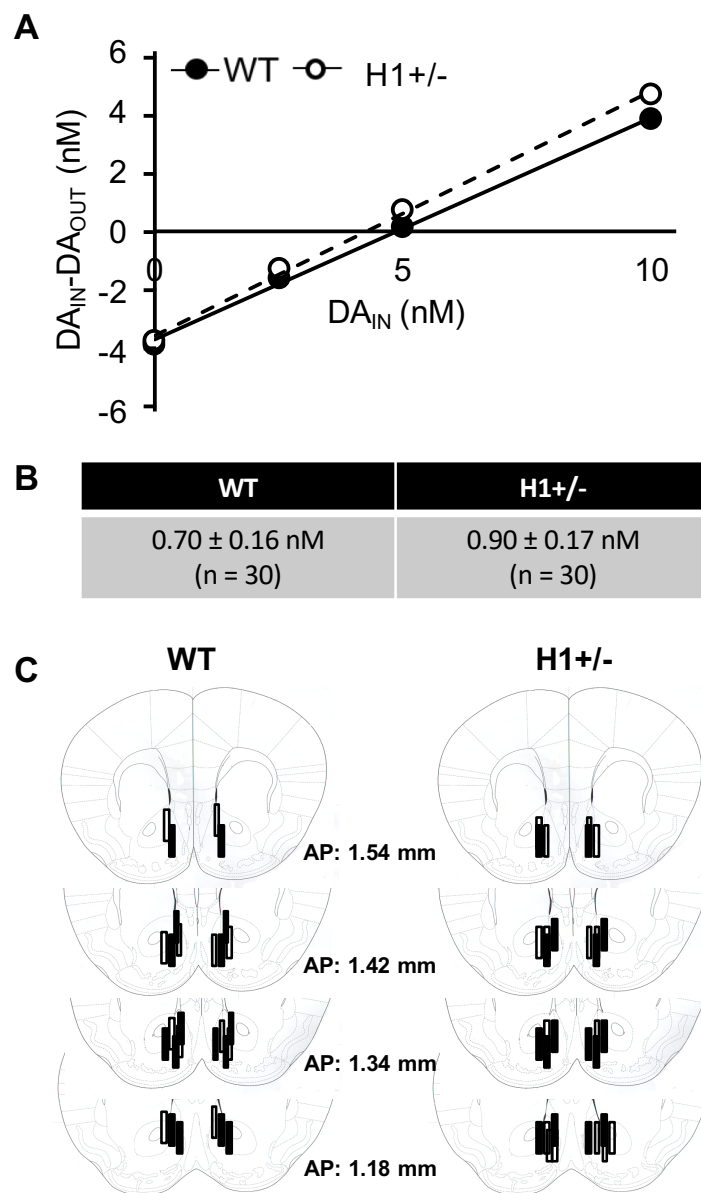

**Figure S7**

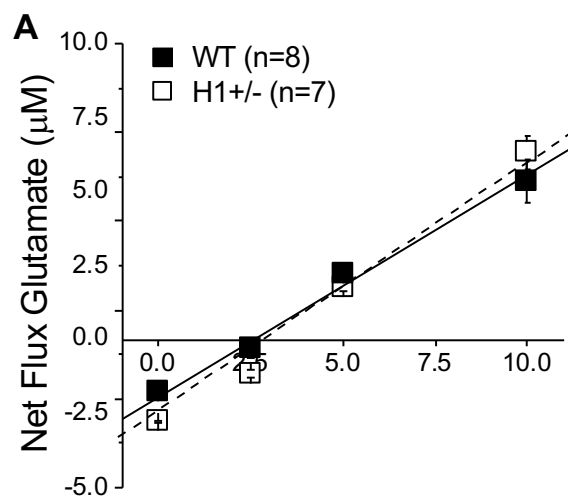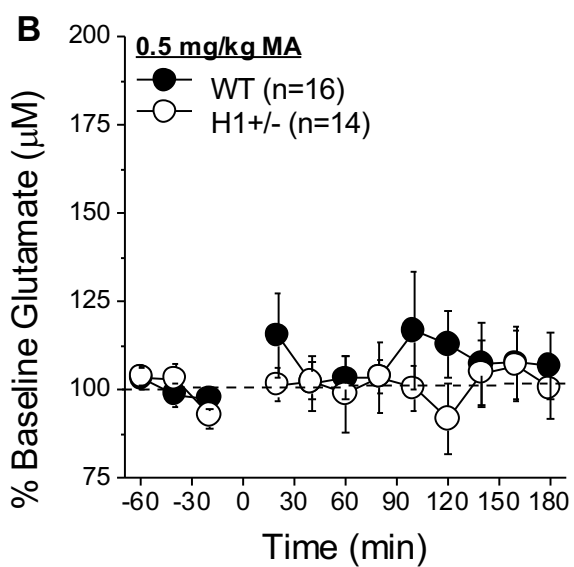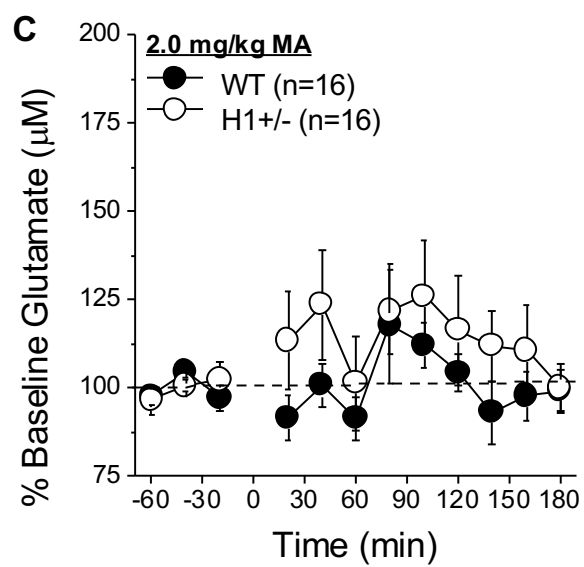

**Figure S8**

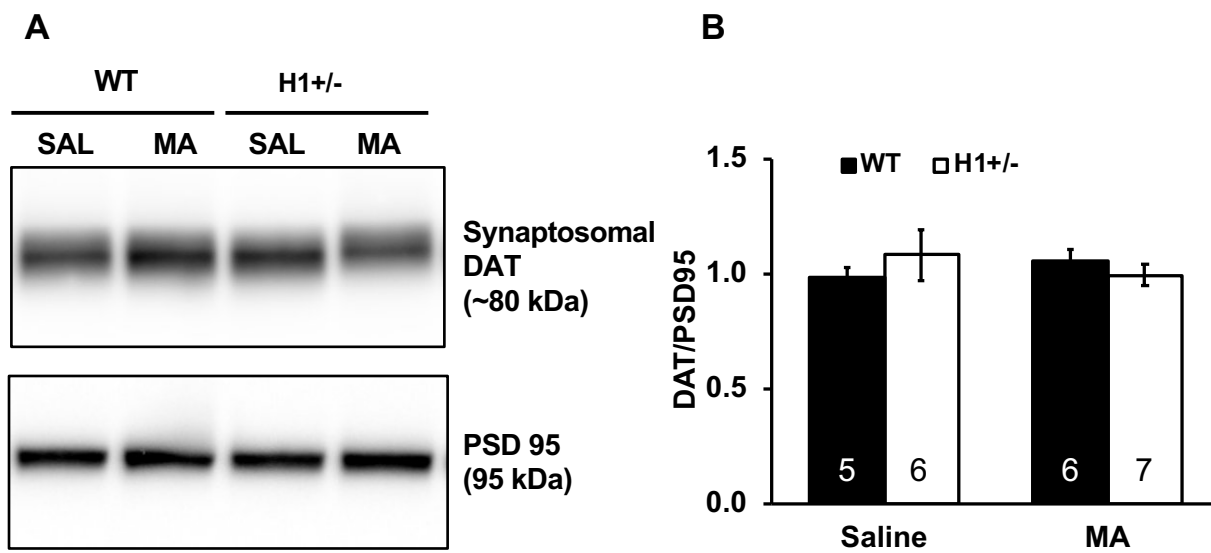



# Figure S9

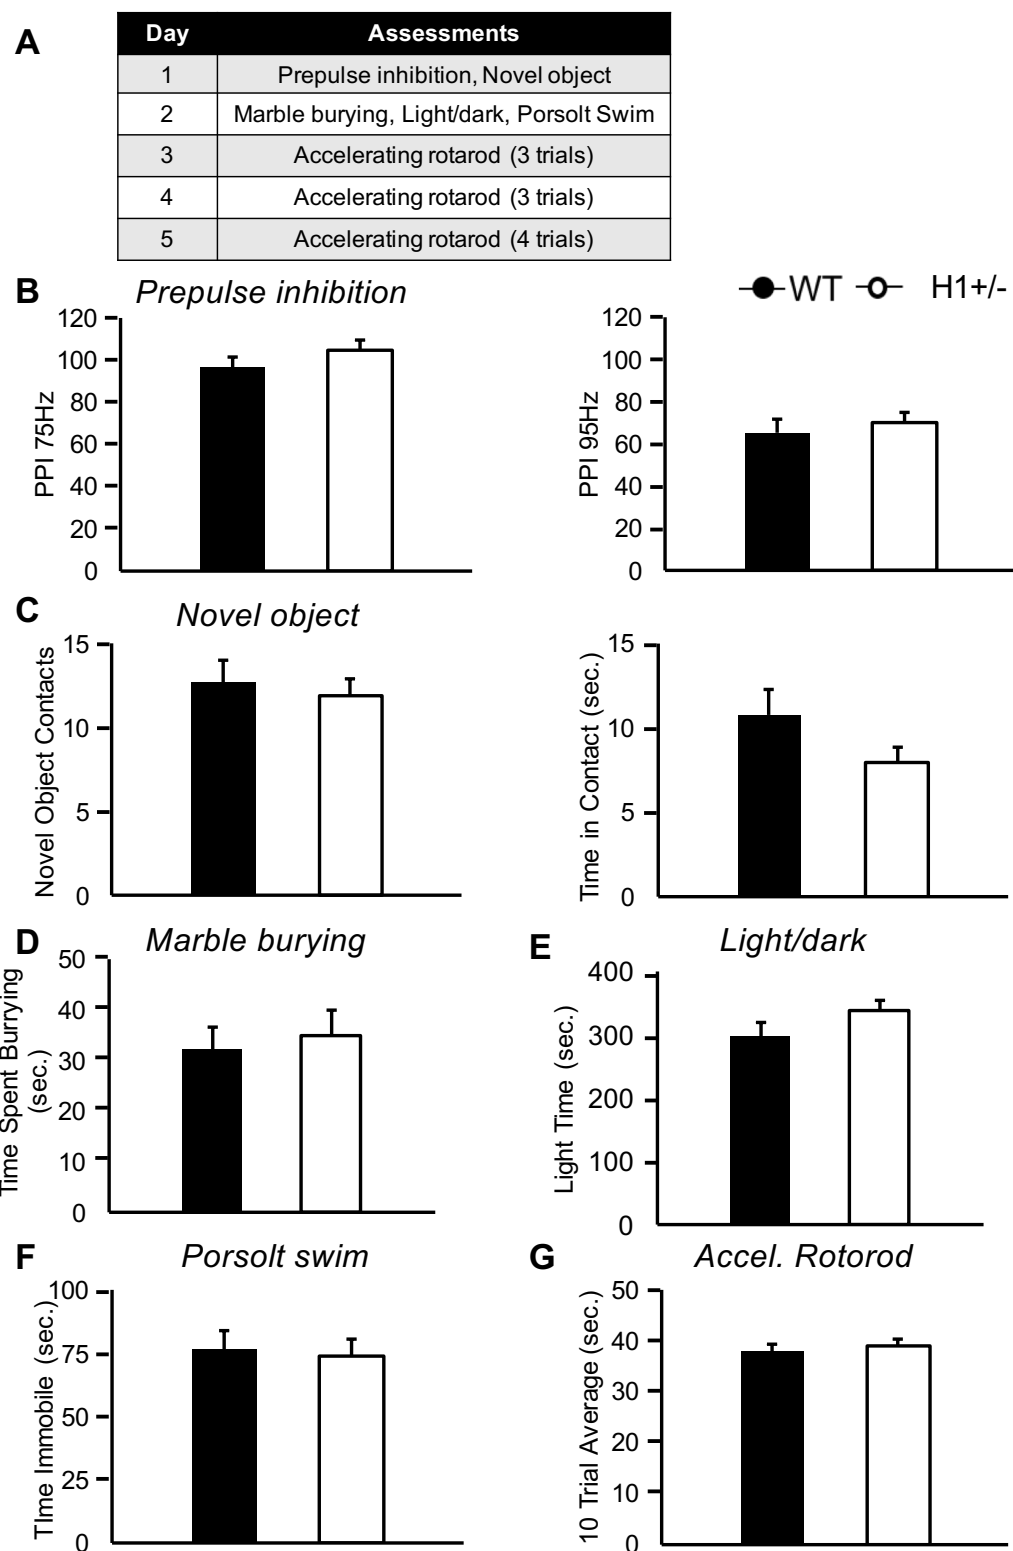

# Figure S10

## A Bregma -3.28 mm to -3.64 mm

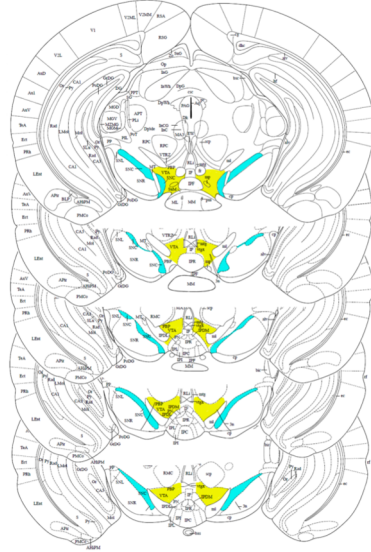

## B Bregma 1.18 mm to 0.86 mm

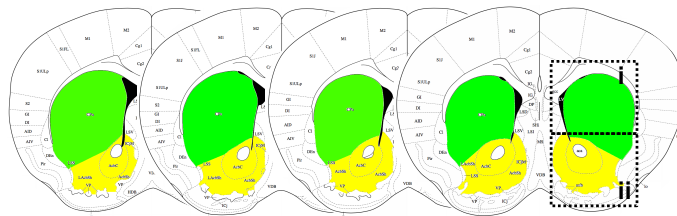

Figure S11

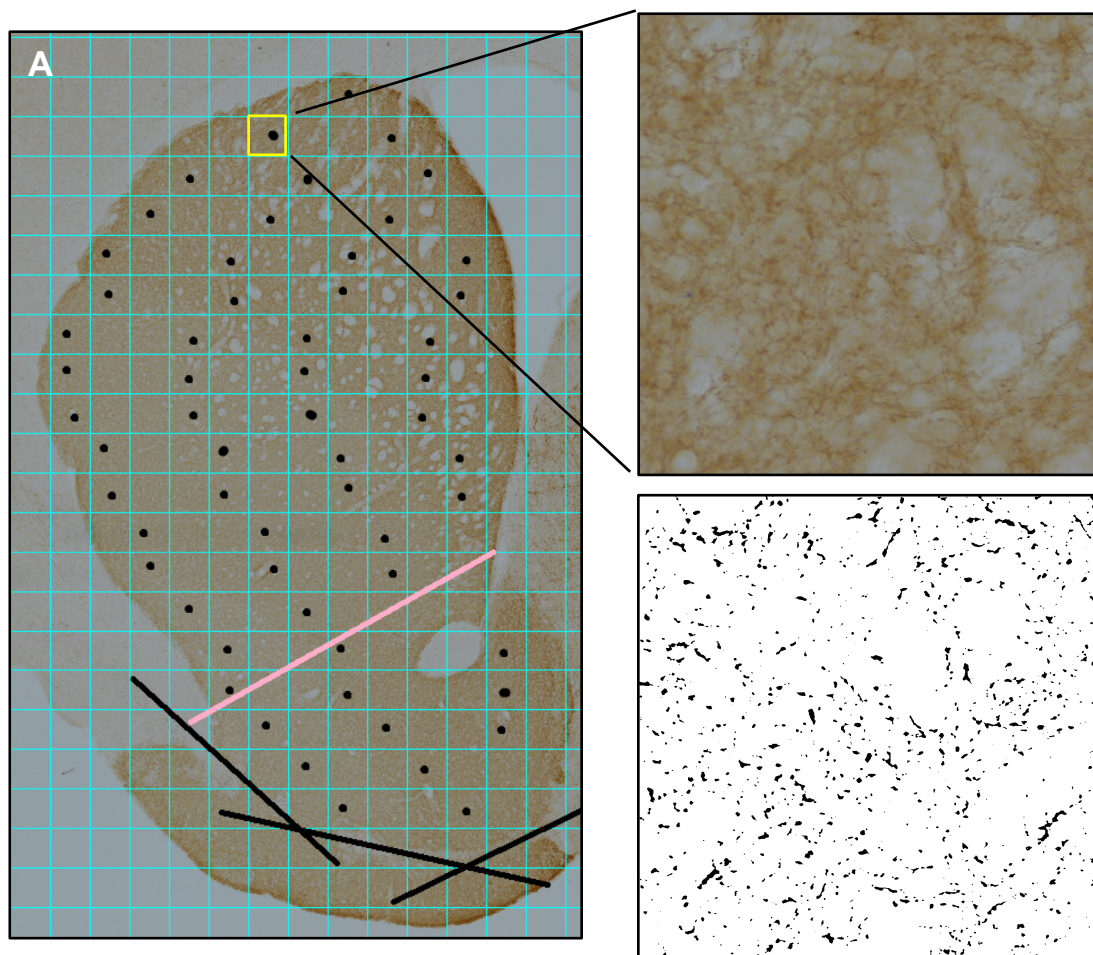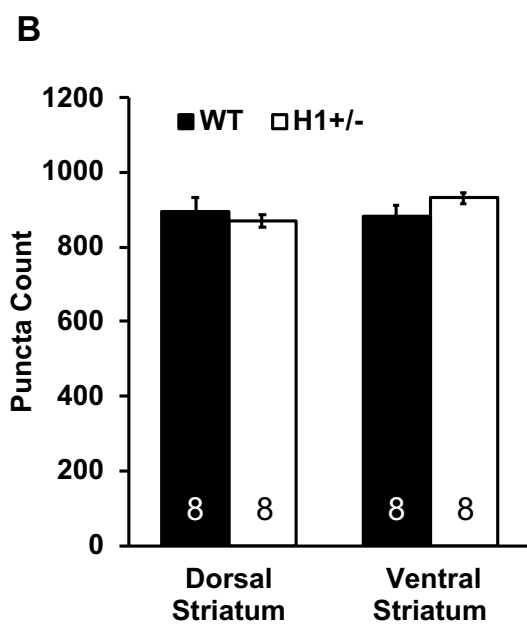

Figure S12

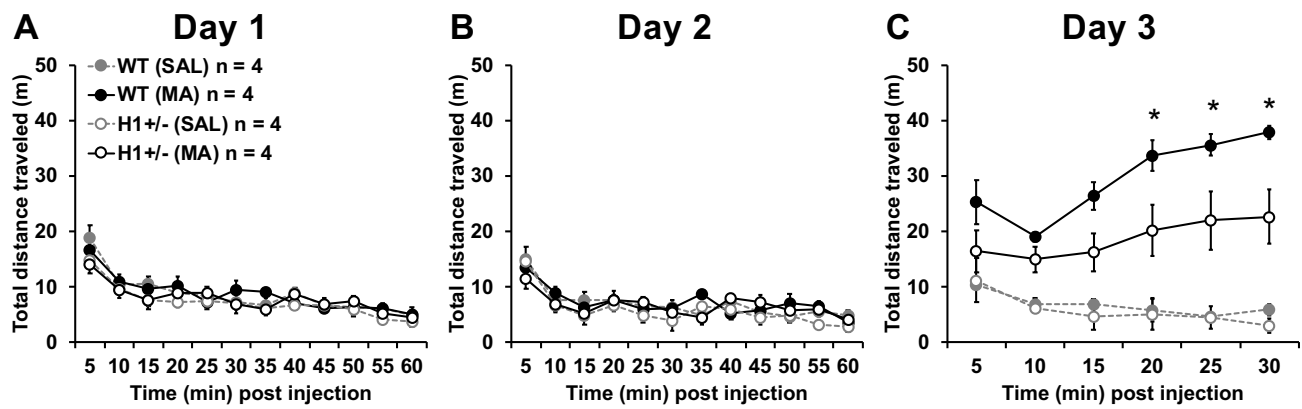

**Figure S13**

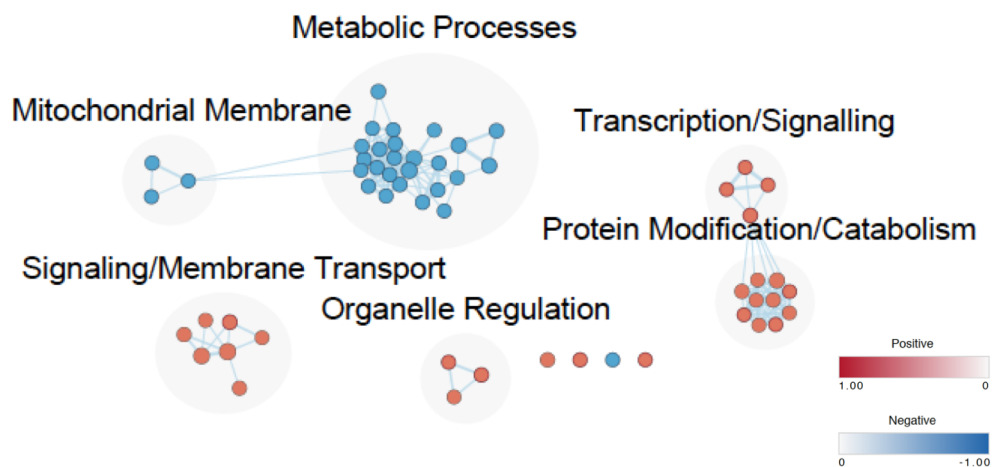

Figure S14

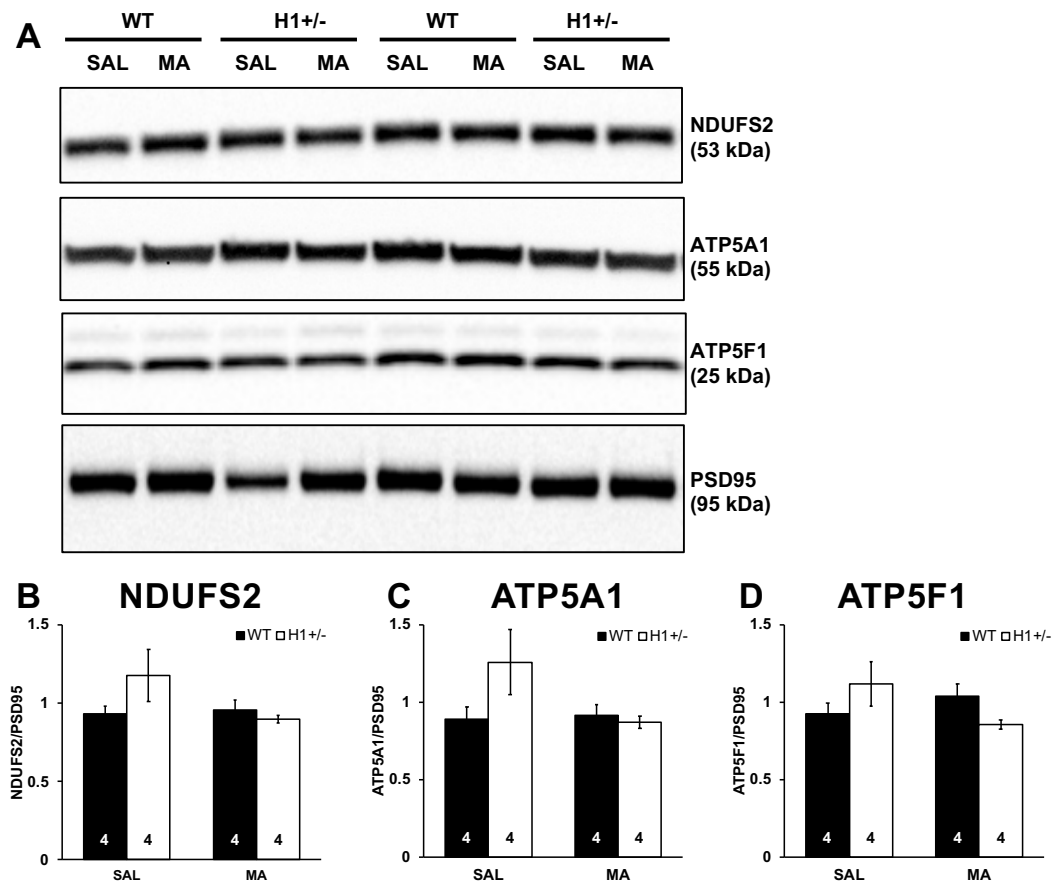

Supplement: Supplementary file [file media-1.pdf]
